# Supplementary material
Source: ML conference proceedings conference paper supplement (https://openreview.net/forum?id=6e86TccKyQ)
Supplement: supplementary_material [file attachment]

## 379 A Decompose risk-of-ruin to individual stages

380 *Proof of Theorem 3.1.* The last claim is trivial: it is easy to verify that (1) and (2) hold if we let  
 381  $\mathcal{T}_t = \emptyset$  for all  $t \in [T]$ . Now we prove the first and the second claim. The case for  $T = 1$  is trivial.  
 382 We assume  $T \geq 2$ . For any  $t = 2, \dots, T$ , we have that

$$\begin{aligned}
 \mathbb{P}(R_t \leq B) &= \mathbb{E}[\mathbb{P}(R_t \leq B \mid \mathcal{F}_{t-1})] \\
 &= \mathbb{E}\left[\mathbb{P}(R_t \leq B, R_{t-1} \leq B \mid \mathcal{F}_{t-1}) + \mathbb{P}(R_t \leq B, R_{t-1} > B \mid \mathcal{F}_{t-1})\right] \\
 &\stackrel{(a)}{\leq} \mathbb{P}(R_{t-1} \leq B) + \mathbb{E}[\mathbb{P}(R_t \leq B, R_{t-1} > B \mid \mathcal{F}_{t-1})] \\
 &= \mathbb{P}(R_{t-1} \leq B) + \mathbb{E}\left[\mathbb{I}(\mathbb{P}(R_{t-1} > B \mid \mathcal{F}_{t-1}) > 0) \right. \\
 &\quad \times \mathbb{P}(R_t \leq B \mid R_{t-1} > B, \mathcal{F}_{t-1}) \mathbb{P}(R_{t-1} > B \mid \mathcal{F}_{t-1}) \\
 &\quad \left. + \mathbb{I}(\mathbb{P}(R_{t-1} > B \mid \mathcal{F}_{t-1}) = 0) \mathbb{P}(R_t \leq B, R_{t-1} > B \mid \mathcal{F}_{t-1})\right] \\
 &\stackrel{(b)}{=} \mathbb{P}(R_{t-1} \leq B) + \mathbb{E}\left[\mathbb{I}(\mathbb{P}(R_{t-1} > B \mid \mathcal{F}_{t-1}) > 0) \right. \\
 &\quad \left. \times \mathbb{P}(R_t \leq B \mid R_{t-1} > B, \mathcal{F}_{t-1}) \mathbb{P}(R_{t-1} > B \mid \mathcal{F}_{t-1})\right] \\
 &\stackrel{(c)}{\leq} \mathbb{P}(R_{t-1} \leq B) + \Delta_t \mathbb{E}\left[\mathbb{I}(\mathbb{P}(R_{t-1} > B \mid \mathcal{F}_{t-1}) > 0) \mathbb{P}(R_{t-1} > B \mid \mathcal{F}_{t-1})\right] \\
 &= \mathbb{P}(R_{t-1} \leq B) + \Delta_t \mathbb{P}(R_{t-1} > B)
 \end{aligned}$$

383 where (b) used that  $\mathbb{P}(R_{t-1} > B \mid \mathcal{F}_{t-1}) = 0 \Rightarrow \mathcal{T}_t = \emptyset$  and that  $r_t((Y_{i,t})_{i \in \mathcal{N}_t}, \emptyset) = 0$ , which  
 384 implies that almost surely

$$\begin{aligned}
 &\mathbb{I}(\mathbb{P}(R_{t-1} > B \mid \mathcal{F}_{t-1}) = 0) \cdot \mathbb{P}(R_t \leq B, R_{t-1} > B \mid \mathcal{F}_{t-1}) \\
 &= \mathbb{I}(\mathbb{P}(R_{t-1} > B \mid \mathcal{F}_{t-1}) = 0) \mathbb{P}(R_{t-1} + r_t((Y_{i,t})_{i \in \mathcal{N}}, \emptyset) \leq B, R_{t-1} > B \mid \mathcal{F}_{t-1}) \\
 &= \mathbb{I}(\mathbb{P}(R_{t-1} > B \mid \mathcal{F}_{t-1}) = 0) \cdot \mathbb{P}(R_{t-1} \leq B, R_{t-1} > B \mid \mathcal{F}_{t-1}) \\
 &= 0
 \end{aligned}$$

385 and (c) used that  $b_t \geq B$ , which implies that almost surely

$$\mathbb{P}(R_t \leq B \mid R_{t-1} > B, \mathcal{F}_t) \leq \mathbb{P}(R_t \leq b_t \mid R_{t-1} > B, \mathcal{F}_t) \leq \Delta_t.$$

386 Rearranging this, we obtain a recurrence relation: for any  $t = 2, \dots, T$ ,

$$\mathbb{P}(R_t > B) \geq (1 - \Delta_t) \cdot \mathbb{P}(R_{t-1} > B). \quad (14)$$

387 Using the recurrence relation repeatedly for all  $t \in [T]$ , we obtain

$$\begin{aligned}
 \mathbb{P}(R_T > B) &\geq \prod_{i=2}^T (1 - \Delta_i) \cdot \mathbb{P}(R_1 > b_1) \geq \prod_{t=1}^T (1 - \Delta_t) \\
 &\implies \mathbb{P}(R_T \leq B) \leq 1 - \prod_{t=1}^T (1 - \Delta_t) \leq \delta
 \end{aligned}$$

388 as required. To prove the second claim, observe that equality is attained in all of the above inequalities  
 389 if equality is attained in (14), (i), (ii) and (iii), and that equality is attained in (14) if equality is  
 390 attained in (a) and (c). Finally, note that equality in (a) is attained if  $r_t \leq 0, \forall t \in [T]$  and equality in  
 391 (c) is attained if equality is attained in (i) and (iv).  $\square$

## 392 B Stochastic domination

393 **Lemma B.1** (Stochastic domination under truncation). *For any two independent real random variable*  
 394  *$X, Z$  and real number  $a, t \in \mathbb{R}$  such that  $\mathbb{P}(X < a) > 0$ , we have that*

$$\mathbb{P}(X + Z \geq t \mid X < a) \leq \mathbb{P}(X + Z \geq t).$$

395 *Proof of Lemma B.1.* Assume that  $\mathbb{P}(X \geq a) > 0$ , or else the proof is trivial. We first claim that  
 396  $\mathbb{P}(X + Z \geq t \mid X < a) \leq \mathbb{P}(X + Z \geq t \mid X \geq a)$ . Note that this holds if and only if

$$\frac{\mathbb{P}(X \geq t - Z, X < a)}{\mathbb{P}(X < a)} \leq \frac{\mathbb{P}(X \geq t - Z, X \geq a)}{\mathbb{P}(X \geq a)}.$$

397 The above holds since its lhs and rhs satisfies

$$\begin{aligned} \frac{\mathbb{P}(X \geq t - Z, X < a)}{\mathbb{P}(X < a)} &= \frac{\mathbb{P}(X \geq t - Z, X < a, a \geq t - Z)}{\mathbb{P}(X < a)} \leq \mathbb{P}(a \geq t - Z) \\ \frac{\mathbb{P}(X \geq t - Z, X \geq a)}{\mathbb{P}(X \geq a)} &= \frac{\mathbb{P}(X \geq t - Z, X \geq a, a < t - Z)}{\mathbb{P}(X \geq a)} + \mathbb{P}(a \geq t - Z) \end{aligned}$$

398 It then follows from law of total probability that

$$\begin{aligned} \mathbb{P}(X + Z \geq t) &= \mathbb{P}(X + Z \geq t \mid X < a)\mathbb{P}(X < a) + \mathbb{P}(X + Z \geq t \mid X \geq a)\mathbb{P}(X \geq a) \\ &\geq \mathbb{P}(X + Z \geq t \mid X < a)\mathbb{P}(X < a) + \mathbb{P}(X + Z \geq t \mid X < a)\mathbb{P}(X \geq a) \\ &= \mathbb{P}(X + Z \geq t \mid X < a) \end{aligned}$$

399 as required.  $\square$

400 *Proof of Lemma 3.2.* If  $M_{t-1}^{(1)} = 0$ , (8) holds with equality since  $S_{t-1}^T(0) < S_{t-1}^T(1) - B \iff$   
 401  $B < 0$ . So, assume  $M_{t-1}^{(1)} > 0$  from now on. By (15f) and the conditional distributions of multivariate  
 402 Gaussian, we have

$$\left[ s_t^T(0) \middle| S_{t-1}^T(0), \mathcal{F}_{t-1} \right] = \left[ \mu_2 + V_{21}V_{11}^{-1}(S_{t-1}^T(0) - \mu_1) + (V_{22} - V_{21}V_{11}^{-1}V_{12})^{1/2}Z \middle| S_{t-1}^T(0), \mathcal{F}_{t-1} \right]$$

403 where  $Z \sim N(0, 1)$  is independent of  $S_{t-1}^T(0)$  conditioned on  $\mathcal{F}_{t-1}$  and  $\mu, V$  are defined in (15f).

404 Here, we used that  $V_{11} > 0$  since  $\sigma_{p,t}(0)^2, \sigma(0)^2 > 0$  by Definition 3.1, and  $M_{t-1}^{(1)} \neq 0$ . Using the  
 405 above and that  $S_t^T(0) = s_t^T(0) + S_{t-1}^T(0)$ , we have

$$\begin{aligned} \left[ S_t^T(0) \middle| S_{t-1}^T(0), \mathcal{F}_{t-1} \right] &= \left[ (V_{21}V_{11}^{-1} + 1)S_{t-1}^T(0) + \mu_2 - V_{21}V_{11}^{-1}\mu_1 \right. \\ &\quad \left. + (V_{22} - V_{21}V_{11}^{-1}V_{12})^{1/2}Z \middle| S_{t-1}^T(0), \mathcal{F}_{t-1} \right]. \end{aligned}$$

406 Since  $V_{21}V_{11}^{-1} + 1 > 0$  in the above, using also that  $b_t - S_{t-1}^T(1), S_{t-1}^T(1) - B \in \mathcal{F}_{t-1}$  and that  
 407  $s_t^T(1)$  is independent of  $S_{t-1}^T(0), S_t^T(0)$ , (8) follows from Lemma B.1.  $\square$

## 408 C Derivation of the decision rule

409 Proof of these facts follows from standard Bayesian analysis (see e.g. [15])

410 **Lemma C.1** (Posterior distributions). *We have for  $w = 0, 1, t \in [T]$*

$$\mu_{p,t}(1) := \mathbb{E} \left[ \mu_{\text{true}}(1) \middle| \mathcal{F}_{t-1} \right] = \frac{1}{\frac{1}{\sigma_0(1)^2} + \frac{M_{t-1}^{(1)}}{\sigma(0)^2}} \left( \frac{\mu_0(1)}{\sigma_0(1)^2} + \frac{S_{t-1}^T(1)}{\sigma(1)^2} \right) \quad (15a)$$

$$\mu_{p,t}(0) := \mathbb{E} \left[ \mu_{\text{true}}(0) \middle| \mathcal{F}_{t-1} \right] = \frac{1}{\frac{1}{\sigma_0(0)^2} + \frac{M_{t-1}^{(0)}}{\sigma(0)^2}} \left( \frac{\mu_0(0)}{\sigma_0(0)^2} + \frac{S_{t-1}^C(0)}{\sigma(0)^2} \right) \quad (15b)$$

$$\sigma_{p,t}(w)^2 := \mathbb{V} \left[ \mu_{\text{true}}(w) \middle| \mathcal{F}_{t-1} \right] = \left( \frac{1}{\sigma_0(w)^2} + \frac{M_{t-1}(w)}{\sigma(w)^2} \right)^{-1} \quad (15c)$$

$$\left[ \mu_{\text{true}}(w) \middle| \mathcal{F}_{t-1} \right] \sim N(\mu_{p,t}(w), \sigma_{p,t}(w)^2) \quad (15d)$$

$$\left[ s_t^T(1) \middle| \mathcal{F}_{t-1} \right] \sim N(\mu_{p,t}(1) \cdot m_t, m_t^2 \cdot \sigma_{p,t}(1)^2 + m_t \cdot \sigma(0)^2) \quad (15e)$$

$$\left[ \left( \frac{S_{t-1}^T(0)}{s_t^T(0)} \right) \middle| \mathcal{F}_{t-1} \right] \sim N(\mu, V) \quad (15f)$$

411 where

$$\mu := \begin{pmatrix} \mu_{p,t}(0) \cdot M_{t-1}^{(1)} \\ \mu_{p,t}(0) \cdot m_t \end{pmatrix},$$

$$V := \begin{pmatrix} (M_{t-1}^{(1)})^2 \sigma_{p,t}(0)^2 + M_{t-1}^{(1)} \sigma(0)^2 & M_{t-1}^{(1)} m_t \sigma_{p,t}(0)^2 \\ M_{t-1}^{(1)} m_t \sigma_{p,t}(0)^2 & m_t^2 \sigma_{p,t}(0)^2 + m_t \sigma(0)^2 \end{pmatrix}.$$

## 412 D Robustness to non-identically distributed and non-Gaussian outcomes

413 *Proof of Theorem 3.3.* To show the experiment by Algorithm 1 is  $(\delta, B)$ -RRC under Definition 3.4,  
 414 it suffices to show that (1), (2) hold for each  $t \geq 1$ . Since (1), (2) hold for each  $t \geq 1$  if  $m_t = 0$ , we  
 415 only need to show that for each  $t \geq 1$ , if  $m_t \neq 0$ , almost surely

$$\mathbb{P}(S_t^T(1) - S_t^T(0) > B \mid \mathcal{F}_t) > 0 \quad (16a)$$

$$\mathbb{P}(S_t^T(1) - S_t^T(0) \leq b_t \mid \mathcal{F}_{t-1}, S_{t-1}^T(1) - S_{t-1}^T(0) > B) \leq \Delta_t. \quad (16b)$$

416 Note that for each  $t \geq 1$ , if  $m_t \neq 0$ ,

$$\begin{aligned} \mathbb{P}(S_t^T(1) - S_t^T(0) \leq b_t \mid \mathcal{F}_{t-1}) &= \mathbb{P}\left(\frac{s_t^T(1) - S_t^T(0) - \tilde{\mu}_t}{\tilde{\sigma}_t} \leq z_t \mid \mathcal{F}_{t-1}\right) \\ &\stackrel{(a)}{\leq} \mathbb{P}\left(\frac{s_t^T(1) - S_t^T(0) - \check{\mu}_t}{\check{\sigma}_t} \leq z_t \mid \mathcal{F}_{t-1}\right) \\ &\stackrel{(b)}{\leq} \Phi(z_t) \stackrel{(c)}{\leq} \Delta_t \end{aligned}$$

417 where we used first inequality in (13) in (a), second inequality in (13) in (b), and (11) in (c).

418 We now show (16a) by induction. For  $t = 1$ , if  $m_1 \neq 0$ , Algorithm 1 ensures that

$$\mathbb{E}(\mathbb{P}(s_1^T(1) - s_1^T(0) \leq b_1 \mid \mathcal{F}_1)) = \mathbb{P}(s_1^T(1) - s_1^T(0) \leq b_1) \leq \Delta_1 < 1$$

419 by construction, which implies that

$$\mathbb{P}(S_1^T(1) - S_1^T(0) > B \mid \mathcal{F}_1) \geq \mathbb{P}(s_1^T(1) - s_1^T(0) > b_1 \mid \mathcal{F}_1) > 0$$

420 almost surely. If  $m_1 = 0$ , then  $\mathbb{P}(S_1^T(1) - S_1^T(0) > B \mid \mathcal{F}_1) = 1$  since  $B < 0$ . This proves the  
 421 base case. For the inductive case, if  $m_t \neq 0$ , Algorithm 1 ensures that

$$\mathbb{E}(\mathbb{P}(S_t^T(1) - S_t^T(0) \leq b_t \mid \mathcal{F}_t) \mid \mathcal{F}_{t-1}) = \mathbb{P}(S_t^T(1) - S_t^T(0) \leq b_t \mid \mathcal{F}_{t-1}) \leq \Delta_t < 1$$

422 by construction, which implies that

$$\mathbb{P}(S_t^T(1) - S_t^T(0) > B \mid \mathcal{F}_t) \geq \mathbb{P}(S_t^T(1) - S_t^T(0) > b_t \mid \mathcal{F}_t) > 0$$

423 almost surely. If  $m_t = 0$ , we have that

$$\mathbb{P}(S_t^T(1) - S_t^T(0) > B \mid \mathcal{F}_t) = \mathbb{P}(S_{t-1}^T(1) - S_{t-1}^T(0) > B \mid \mathcal{F}_{t-1}) > 0$$

424 from inductive hypothesis. This shows (16a).

425 To show (16b), note that under Definition 3.4,

$$\begin{aligned} &[s_t^T(1) - S_t^T(0) \mid \mathcal{F}_{t-1}, S_{t-1}^T(0) < S_{t-1}^T(1) - B] \\ &\stackrel{d}{=} s_t^T(1) - s_t^T(0) - [S_{t-1}^T(0) \mid \mathcal{F}_{t-1}, S_{t-1}^T(0) < S_{t-1}^T(1) - B] \end{aligned}$$

426 On the rhs,  $s_t^T(1) - s_t^T(0)$  is independent of

$$[S_{t-1}^T(0) \mid \mathcal{F}_{t-1}, S_{t-1}^T(0) < S_{t-1}^T(1) - B]$$

427 and that  $S_{t-1}^T(1) - B \in \mathcal{F}_{t-1}$ . It follows from these, (16a) and Lemma B.1 that

$$\begin{aligned} &\mathbb{P}\left(s_t^T(1) - s_t^T(0) - S_{t-1}^T(0) \leq b_t \mid \mathcal{F}_{t-1}, S_{t-1}^T(0) < S_{t-1}^T(1) - B\right) \\ &\leq \mathbb{P}(s_t^T(1) - S_t^T(0) \leq b_t \mid \mathcal{F}_{t-1}) \end{aligned}$$

428 Therefore, for each  $t \geq 1$ , if  $m_t \neq 0$ ,

$$\mathbb{P}(S_t^T(1) - S_t^T(0) \leq b_t \mid \mathcal{F}_{t-1}, S_{t-1}^T(1) - S_{t-1}^T(0) > B) \leq \Delta_t$$

429 as required. This concludes the proof.  $\square$

430 **When are (13) satisfied** Fix any  $t \geq 1$  where  $m_t \neq 0$ . Note that

$$[s_t^T(1) - S_t^T(0) \mid \mathcal{F}_{t-1}] = \sum_{i \in \mathcal{T}_t} (Y_{i,t}(1) - Y_{i,t}(0)) - \sum_{r \in [t-1]} \sum_{i \in \mathcal{T}_r} [Y_{i,r}(0) \mid Y_{i,r}(1)]$$

431 The summands on the rhs are independent random variables under Definition 3.4. We thus expect  
432 that when  $m_t$  or  $M_{t-1}^{(1)}$  are sufficiently large,

$$\frac{[s_t^T(1) - S_t^T(0) \mid \mathcal{F}_{t-1}] - \mathbb{E}[s_t^T(1) - S_t^T(0) \mid \mathcal{F}_{t-1}]}{\sqrt{\mathbb{V}[s_t^T(1) - S_t^T(0) \mid \mathcal{F}_{t-1}]}} \approx N(0, 1)$$

433 by central limit theorem under mild moment-growth conditions (e.g. Lyapunov's conditions). We  
434 thus expect that first condition in (13) holds when  $m_t$  or  $M_{t-1}^{(1)}$  are sufficiently large for each  $t \geq 1$ .

435 We now focus on the second condition in (13). Suppose that  $\Delta_t \leq 0.5$ , which implies  $z_t \leq 0$  by (11).  
436 Note that we can write

$$\begin{aligned} \check{\mu}_t &= \sum_{i \in \mathcal{T}_t} \mathbb{E}(Y_{i,t}(1) - Y_{i,t}(0)) - \sum_{r \in [t-1]} \sum_{i \in \mathcal{T}_r} \mathbb{E}[Y_{i,t}(0) \mid Y_{i,t}(1)] \\ \check{\sigma}_t^2 &= \sum_{r \in [t-1]} \mathbb{V}(Y_{i,t}(1) - Y_{i,t}(0)) + \sum_{i \in \mathcal{T}_r} \mathbb{V}[Y_{i,t}(0) \mid \sigma(Y_{i,t}(1))] \end{aligned}$$

437 and

$$\begin{aligned} \tilde{\mu}_t &= m_t (\mu_{p,t}(1) - \mu_{p,t}(0)) - \mu_{p,t}(0) M_{t-1}^{(1)} \\ \tilde{\sigma}_t^2 &= m_t \cdot (\sigma(1)^2 + \sigma(0)^2) + M_{t-1}^{(1)} \cdot \sigma(0)^2 + m_t^2 \cdot \sigma_{p,t}(1)^2 + (m_t + M_{t-1}^{(1)})^2 \cdot \sigma_{p,t}(0)^2. \end{aligned}$$

438 For  $t = 1$ ,

$$\check{\mu}_t = \sum_{i \in \mathcal{T}_t} \mathbb{E}(Y_{i,t}(1) - Y_{i,t}(0)), \quad \check{\sigma}_t^2 = \sum_{i \in \mathcal{T}_t} \mathbb{V}(Y_{i,t}(1) - Y_{i,t}(0))$$

439 and

$$\begin{aligned} \tilde{\mu}_t &= m_t (\mu_0(1) - \mu_0(0)), \\ \tilde{\sigma}_t^2 &= m_t \cdot (\sigma(0)^2 + \sigma(1)^2) + m_t^2 \cdot (\sigma_0(1)^2 + \sigma_0(0)^2). \end{aligned}$$

440 So, second condition in (13) holds for  $t = 1$  if we have chosen prior and model parameters such that

$$\begin{aligned} \mu_0(1) - \mu_0(0) &\leq \frac{1}{m_t} \sum_{i \in \mathcal{T}_1} \mathbb{E}(Y_{i,1}(1) - Y_{i,1}(0)) \\ \sigma(0)^2 + \sigma(1)^2 + m_t \cdot (\sigma_0(1)^2 + \sigma_0(0)^2) &\geq \frac{1}{m_t} \sum_{i \in \mathcal{T}_t} \mathbb{V}(Y_{i,t}(1) - Y_{i,t}(0)) \end{aligned}$$

441 This corresponds to that we choose prior and model parameters conservatively in the sense that we  
442 do not overestimate treatment effect or underestimate its variability. Now fix any  $t \geq 2$ . From the law  
443 of large number, we expect that for  $M_{t-1}^{(1)}$  sufficiently large

$$\begin{aligned} \mu_{p,t}(0) &\approx \frac{1}{M_{t-1}^{(1)}} \sum_{r \in [t-1]} \sum_{i \in \mathcal{T}_r} \mathbb{E}[Y_{i,t}(0)] \\ \frac{1}{M_{t-1}^{(1)}} \sum_{r \in [t-1]} \sum_{i \in \mathcal{T}_r} \mathbb{E}[Y_{i,t}(0) \mid Y_{i,t}(1)] &\approx \frac{1}{M_{t-1}^{(1)}} \sum_{r \in [t-1]} \sum_{i \in \mathcal{T}_r} \mathbb{E}[Y_{i,t}(0)] \\ \mu_{p,t}(1) - \mu_{p,t}(0) &\approx \frac{1}{M_{t-1}^{(1)}} \sum_{r \in [t-1]} \sum_{i \in \mathcal{T}_r} \mathbb{E}[Y_{i,t}(1) - Y_{i,t}(0)] \\ \frac{1}{M_{t-1}^{(1)}} \sum_{r \in [t-1]} \sum_{i \in \mathcal{T}_r} \mathbb{V}[Y_{i,t}(0) \mid Y_{i,t}(1)] &\approx \frac{1}{M_{t-1}^{(1)}} \sum_{r \in [t-1]} \sum_{i \in \mathcal{T}_r} \mathbb{E}\mathbb{V}[Y_{i,t}(0) \mid Y_{i,t}(1)] \\ &\leq \frac{1}{M_{t-1}^{(1)}} \sum_{r \in [t-1]} \sum_{i \in \mathcal{T}_r} \mathbb{V}[Y_{i,t}(0)] \end{aligned}$$

444 So if the treatment effects increase or stay roughly constant throughout the experiments

$$\frac{1}{m_t} \sum_{i \in \mathcal{T}_t} \mathbb{E}(Y_{i,t}(1) - Y_{i,t}(0)) \geq \frac{1}{M_{t-1}^{(1)}} \sum_{r \in [t-1]} \sum_{i \in \mathcal{T}_r} \mathbb{E}[Y_{i,t}(1) - Y_{i,t}(0)]$$

445 and our variance estimates  $\sigma(0)^2, \sigma(1)^2$  are accurate or conservative in the sense that

$$\sigma(0)^2 \geq \frac{1}{M_{t-1}^{(1)}} \sum_{r \in [t-1]} \sum_{i \in \mathcal{T}_r} \mathbb{V}[Y_{i,t}(0)], \quad \sigma(0)^2 + \sigma(1)^2 \geq \frac{1}{m_t} \sum_{i \in \mathcal{T}_t} \mathbb{V}(Y_{i,t}(1) - Y_{i,t}(0))$$

446 the second condition in (13) holds for each  $t \geq 2$  and the experiment produced by Algorithm 1 is  
447  $(\delta, B)$ -RRC.

## 448 E Algorithm for general Bayesian models and costs

449 The following outcome model is a generalization of Definition 3.1. Here, experiment outcomes are  
450 allowed to be multivariate with each coordinate corresponds a different business metric.

451 **Definition E.1** (General Bayesian model). Fix  $p, q \geq 1$ . The model parameter  $\theta_{\text{true}} \in \mathbb{R}^q$  is generated  
452 from certain prior  $\pi_0$ . The experiment outcome of unit  $i$  at stage  $t$  are distributed independently and  
453 identically as

$$\left( Y_{i,t}(0), Y_{i,t}(1) \right) \stackrel{\text{iid}}{\sim} p(\theta_{\text{true}})$$

454 where  $Y_{i,t}(0), Y_{i,t}(1) \in \mathbb{R}^q$  and  $p(\theta_{\text{true}})$  is a probability distribution on  $\mathbb{R}^{p \times p}$ .

455 The following is a generalization of Definition 2.1. It allows for general experiment cost beyond  
456 treatment effect. The cost of treating unit  $i$  is now  $h_{it} = h_t(Y_{i,t}(1), Y_{i,t}(0))$  for some function  
457  $h_t : \mathbb{R}^{p \times p} \mapsto \mathbb{R}$  chosen by the user. For instance,  $h_t$  can be chosen to compute the worst treatment  
458 effect across multiple business metrics.

459 **Definition E.2** (General experiment cost). For each  $t \geq 1$ , let the experiment cost from stage- $t$  and  
460 treated unit  $i$  be  $h_{it} = h_t(Y_{i,t}(1), Y_{i,t}(0))$  where  $h_t : \mathbb{R}^{p \times p} \mapsto \mathbb{R}$  is any user-chosen function. Then  
461 define  $r_t := \sum_{i \in \mathcal{T}_t} h_{i,t}$ . We let  $r_t = 0$  if  $\mathcal{T}_t = \emptyset$ . Define the cumulative experiment cost up to stage  
462  $t$  as  $R_t := \sum_{k \in [t]} r_k$ .

463 We now move to derive an explicit algorithm Algorithm 1 from Theorem 3.1 that output  $(m_t)_{t \geq 1}$   
464 such that the experiment is  $(\delta, B)$ -RRC. Compared to Algorithm 1, the algorithm developed in this  
465 section will require Monte-Carlo simulations and generally gives more conservative ramp schedule.

466 We first review the Cantelli's inequality, which is an improved version of the well-known Chebyshev's  
467 inequality for one-sided tail bounds.

468 **Lemma E.3** (Cantelli's inequality). For any  $\lambda \geq 0$ , and real-valued random variable  $X$  with finite  
469 variance,

$$\mathbb{P}(X - \mathbb{E}(X) \geq \lambda) \leq \frac{1}{1 + \lambda^2 / \mathbb{V}(X)}$$

470 Given that (i)  $\mathbb{P}(R_{t-1} \geq B \mid \mathcal{F}_{t-1}) > 0$  and that (ii)  $\mathbb{E}[R_t \mid R_{t-1} \geq B, \mathcal{F}_{t-1}] \geq b_t$ , a direct  
471 application of Cantelli's inequality shows that

$$\begin{aligned} & \mathbb{P}(R_t \leq b_t \mid R_{t-1} > B, \mathcal{F}_{t-1}) \\ &= \mathbb{P}\left(\mathbb{E}[R_t \mid R_{t-1} > B, \mathcal{F}_{t-1}] - R_t \geq \mathbb{E}[R_t \mid R_{t-1} > B, \mathcal{F}_{t-1}] - b_t \mid R_{t-1} > B, \mathcal{F}_{t-1}\right) \\ &\leq \left(1 + \frac{(\mathbb{E}[R_t \mid R_{t-1} > B, \mathcal{F}_{t-1}] - b_t)^2}{\mathbb{V}(R_t \mid R_{t-1} > B, \mathcal{F}_{t-1})}\right)^{-1} \end{aligned}$$

472 where  $\mathcal{F}_0$  denotes trivial  $\sigma$ -algebra.

Our strategy to construct an algorithm that selects ramp size  $m_t$  such that (1), (2) hold is as follows: we first verify that condition (i) holds; if not, set  $m_t = 0$  and otherwise find  $m_t$  such that the following two inequalities hold

$$\mathbb{E}[R_t \mid R_{t-1} \geq B, \mathcal{F}_{t-1}] \geq b_t \quad (17a)$$

$$\frac{1}{1 + \frac{(\mathbb{E}[R_t \mid R_{t-1} \geq B, \mathcal{F}_{t-1}] - b_t)^2}{\mathbb{V}(R_t \mid R_{t-1} \geq B, \mathcal{F}_{t-1})}} \leq \Delta_t \quad (17b)$$

To accomplish this, note that by exchangeability of the outcomes under Definition E.1,

$$\begin{aligned} \mathbb{E}[R_t \mid R_{t-1} \geq B, \mathcal{F}_{t-1}] &= \mathbb{E}[r_t \mid R_{t-1} \geq B, \mathcal{F}_{t-1}] + \mathbb{E}[R_{t-1} \mid R_{t-1} \geq B, \mathcal{F}_{t-1}] \\ &= m_t \mathbb{E}[h_{i=1,t} \mid R_{t-1} \geq B, \mathcal{F}_{t-1}] + \mathbb{E}[R_{t-1} \mid R_{t-1} \geq B, \mathcal{F}_{t-1}] \end{aligned} \quad (18)$$

and

$$\begin{aligned} \mathbb{V}(R_t \mid R_{t-1} \geq B, \mathcal{F}_{t-1}) &= \mathbb{V}(r_t \mid R_{t-1} \geq B, \mathcal{F}_{t-1}) + \mathbb{V}(R_{t-1} \mid R_{t-1} \geq B, \mathcal{F}_{t-1}) \\ &\quad + \text{Cov}(r_t, R_{t-1} \mid R_{t-1} \geq B, \mathcal{F}_{t-1}) \\ &= m_t \mathbb{V}(h_{i=1,t} \mid R_{t-1} \geq B, \mathcal{F}_{t-1}) \\ &\quad + m_t(m_t - 1) \text{Cov}(h_{i=1,t}, h_{i=2,t} \mid R_{t-1} \geq B, \mathcal{F}_{t-1}) \\ &\quad + \mathbb{V}(R_{t-1} \mid R_{t-1} \geq B, \mathcal{F}_{t-1}) + \text{Cov}(r_t, R_{t-1} \mid R_{t-1} \geq B, \mathcal{F}_{t-1}) \end{aligned} \quad (19)$$

We thus require a Monte-Carlo procedure to output estimates  $\hat{\varphi}_t(0), \dots, \hat{\varphi}_t^{(6)}$  for the following posterior quantities on the rhs of (18), (19)

$$\begin{aligned} \mathbb{P}(R_{t-1} \geq B \mid \mathcal{F}_{t-1}) &\leftarrow \hat{\varphi}_t(0) \\ \mathbb{E}(h_{i=1,t} \mid R_{t-1} \geq B, \mathcal{F}_{t-1}) &\leftarrow \hat{\varphi}_t(1) \\ \mathbb{E}(R_{t-1} \mid R_{t-1} \geq B, \mathcal{F}_{t-1}) &\leftarrow \hat{\varphi}_t^{(2)} \\ \mathbb{V}(h_{i=1,t} \mid R_{t-1} \geq B, \mathcal{F}_{t-1}) &\leftarrow \hat{\varphi}_t^{(3)} \\ \text{Cov}(h_{i=1,t}, h_{i=2,t} \mid R_{t-1} \geq B, \mathcal{F}_{t-1}) &\leftarrow \hat{\varphi}_t^{(4)} \\ \mathbb{V}(R_{t-1} \mid R_{t-1} \geq B, \mathcal{F}_{t-1}) &\leftarrow \hat{\varphi}_t^{(5)} \\ \text{Cov}(h_{i=1,t}, R_{t-1} \mid R_{t-1} \geq B, \mathcal{F}_{t-1}) &\leftarrow \hat{\varphi}_t^{(6)} \end{aligned}$$

where  $h_{i=1,t}, h_{i=2,t}$  denote costs from treating two units  $i = 1, 2$  at stage  $t$ . Recall that under (...), the outcome of the units are exchangeable. So  $i = 1, 2$  simply refers to any two distinct units. These quantities will be used to construct estimates of  $\mathbb{E}[R_t \mid R_{t-1} \geq B, \mathcal{F}_{t-1}]$  and  $\mathbb{V}(R_t \mid R_{t-1} \geq B, \mathcal{F}_{t-1})$  as functions of  $m_t$  chosen.

We now outline a procedure to construct  $\hat{\varphi}_t(0), \dots, \hat{\varphi}_t^{(6)}$ . Firstly, suppose that we can obtain  $K$  samples from the posterior distribution

$$\left[ (Y_{i,r}(0))_{i \in \mathcal{T}_r, r \in [t-1]}, Y_{i=1,t}(0), Y_{i=1,t}(1), Y_{i=2,t}(0), Y_{i=2,t}(1) \mid \mathcal{F}_{t-1} \right], \quad (20)$$

from certain MCMC algorithms. The specific details of the MCMC algorithm will depend on the Bayesian model used, but generating posterior-predictive samples while imputing unobserved data, as required in (20), is a common objective of such algorithms (see e.g. [15, Chapter 18]). Let us denote the  $K$  samples as

$$\left( Y_{i,r}^{\{k\}}(0) \right)_{i \in \mathcal{T}_r, r \in [t-1]}, \left( Y_{i,t}^{\{k\}}(0) \right), Y_{i=1,t}^{\{k\}}(1), Y_{i=2,t}^{\{k\}}(0), Y_{i=2,t}^{\{k\}}(1), \quad k = 1, \dots, K \quad (21)$$

These will give us  $K$  samples from  $[h_{i=1,t}, h_{i=2,t}, R_{t-1} \mid \mathcal{F}_{t-1}]$  as follows:

$$\begin{aligned} \left( \hat{h}_{i=1,t}^{\{k\}}, \hat{h}_{i=2,t}^{\{k\}}, \hat{R}_{t-1}^{\{k\}} \right) &= \left( h_t \left( Y_{i=1,t}^{\{k\}}(1) - Y_{i=1,t}^{\{k\}}(0) \right), h_t \left( Y_{i=2,t}^{\{k\}}(1) - Y_{i=2,t}^{\{k\}}(0) \right), \right. \\ &\quad \left. \sum_{r=1}^{t-1} \sum_{i \in \mathcal{T}_r} h_r \left( Y_{i,r}^{\{k\}}(1) - Y_{i,r}^{\{k\}}(0) \right) \right), \quad k = 1, \dots, K \end{aligned}$$

491 Then we can estimate  $\mathbb{P}(R_{t-1} \geq B \mid \mathcal{F}_{t-1})$  by

$$\mathbb{P}(R_{t-1} \geq B \mid \mathcal{F}_{t-1}) \leftarrow \hat{\varphi}_t(0) = \frac{1}{K} \sum_{k=1}^K \mathbb{I}(\hat{R}_{t-1}^{\{k\}} \geq B)$$

492 Let

$$\mathcal{L}_t := \left\{ k \in [K] : \hat{R}_{t-1}^{\{k\}} \geq B \right\} \subset [K]$$

493 which denotes the subset of the  $K$  Monte-Carlo samples for which the budgets are not depleted.

494 If  $\hat{\varphi}_t(0) = 0 \iff \mathcal{L}_t = \emptyset$ , we can simply out  $m_t = 0$  since this corresponds to the case that  
 495 the condition (i) does not hold, i.e.  $\mathbb{P}(R_t \leq b_t \mid R_{t-1} > B, \mathcal{F}_{t-1}) \approx 0$ . Otherwise, we continue to  
 496 construct  $\hat{\varphi}_t(1), \dots, \hat{\varphi}_t^{(6)}$  as follows:

$$\begin{aligned} \mathbb{E}(h_{i=1,t} \mid R_{t-1} \geq B, \mathcal{F}_{t-1}) &\leftarrow \hat{\varphi}_t(1) = \frac{1}{|\mathcal{L}_t|} \sum_{k \in \mathcal{L}_t} \hat{h}_{i=1,t}^{\{k\}} \\ \mathbb{E}(R_{t-1} \mid R_{t-1} \geq B, \mathcal{F}_{t-1}) &\leftarrow \hat{\varphi}_t^{(2)} = \frac{1}{|\mathcal{L}_t|} \sum_{k \in \mathcal{L}_t} \hat{R}_{t-1}^{\{k\}} \\ \mathbb{V}(h_{i=1,t} \mid R_{t-1} \geq B, \mathcal{F}_{t-1}) &\leftarrow \hat{\varphi}_t^{(3)} = \frac{1}{|\mathcal{L}_t|} \sum_{k \in \mathcal{L}_t} \left( \hat{h}_{i=1,t}^{\{k\}} \right)^2 - (\hat{\varphi}_t(1))^2 \\ \text{Cov}(h_{i=1,t}, h_{i=2,t} \mid R_{t-1} \geq B, \mathcal{F}_{t-1}) & \tag{22} \\ &\leftarrow \hat{\varphi}_t^{(4)} = \frac{1}{|\mathcal{L}_t|} \sum_{k \in \mathcal{L}_t} \hat{h}_{i=1,t}^{\{k\}} \hat{h}_{i=2,t}^{\{k\}} - \hat{\varphi}_t(1) \left( \frac{1}{|\mathcal{L}_t|} \sum_{k \in \mathcal{L}_t} \hat{h}_{i=2,t}^{\{k\}} \right) \\ \mathbb{V}(R_{t-1} \mid R_{t-1} \geq B, \mathcal{F}_{t-1}) &\leftarrow \hat{\varphi}_t^{(5)} = \frac{1}{|\mathcal{L}_t|} \sum_{k \in \mathcal{L}_t} \left( \hat{R}_{t-1}^{\{k\}} \right)^2 - (\hat{\varphi}_t^{(2)})^2 \\ \text{Cov}(h_{i=1,t}, R_{t-1} \mid R_{t-1} \geq B, \mathcal{F}_{t-1}) &\leftarrow \hat{\varphi}_t^{(6)} = \frac{1}{|\mathcal{L}_t|} \sum_{k \in \mathcal{L}_t} \hat{h}_{i=1,t}^{\{k\}} \hat{h}_{i=2,t}^{\{k\}} - \hat{\varphi}_t(1) \hat{\varphi}_t^{(2)} \end{aligned}$$

497 From (18), (19) and the Monte-Carlo estimates above, we then have estimators for

498  $\mathbb{E}[R_t \mid R_{t-1} \geq B, \mathcal{F}_{t-1}]$ ,  $\mathbb{V}[R_t \mid R_{t-1} \geq B, \mathcal{F}_{t-1}]$  in terms of  $\hat{\varphi}_t(1), \dots, \hat{\varphi}_t^{(6)}$  as follows

$$\begin{aligned} \mathbb{E}[R_t \mid R_{t-1} \geq B, \mathcal{F}_{t-1}] &\leftarrow m_t \cdot \hat{\varphi}_t(1) + \hat{\varphi}_t^{(2)} \\ \mathbb{V}[R_t \mid R_{t-1} \geq B, \mathcal{F}_{t-1}] &\leftarrow \left( m_t \cdot \hat{\varphi}_t^{(3)} + m_t(m_t - 1) \cdot \hat{\varphi}_t^{(4)} \right) + \hat{\varphi}_t^{(5)} + m_t \cdot \hat{\varphi}_t^{(6)} \end{aligned}$$

499 The two inequalities in (17) then become

$$m_t \cdot \hat{\varphi}_t(1) + \hat{\varphi}_t^{(2)} \geq b_t \tag{23a}$$

$$\frac{1}{1 + \frac{(m_t \cdot \hat{\varphi}_t(1) + \hat{\varphi}_t^{(2)} - b_t)^2}{(m_t \cdot \hat{\varphi}_t^{(3)} + m_t(m_t - 1) \cdot \hat{\varphi}_t^{(4)} + \hat{\varphi}_t^{(5)} + m_t \cdot \hat{\varphi}_t^{(6)})}} \leq \Delta_t \tag{23b}$$

500 respectively. Assume that  $\Delta_t > 0$  or else set  $m_t = 0$  directly. Observe that (23b) can be written as,  
 501 with  $q_t := \Delta_t^{-1} - 1$ ,

$$A_t m_t^2 + B_t m_t + C_t \geq 0$$

502 where

$$\begin{aligned} A_t &:= (\hat{\varphi}_t(1))^2 - q_t \hat{\varphi}_t^{(4)} \\ B_t &:= 2\hat{\varphi}_t(1) \left( \hat{\varphi}_t^{(2)} - b_t \right) - q_t \hat{\varphi}_t^{(3)} + q_t \hat{\varphi}_t^{(4)} - q_t \hat{\varphi}_t^{(6)} \\ C_t &:= \left( \hat{\varphi}_t^{(2)} - b_t \right)^2 - q_t \hat{\varphi}_t^{(5)} \end{aligned} \tag{24}$$

503 Then one can choose  $m_t$  to be the largest, positive integer in the range defined by

$$m_t \cdot \hat{\varphi}_t(1) + \hat{\varphi}_t^{(2)} \geq b_t, \quad A_t m_t^2 + B_t m_t + C_t \geq 0$$

504 If the range does not contain any positive integer, we set  $m_t = 0$ . Note that the range can be  
 505 easily identified after solving the quadratic equation  $A_t m_t^2 + B_t m_t + C_t = 0$ . Algorithm 2 gives  
 506 the algorithm that outputs ramp sizes adaptively. Note that by construction, it gives a  $(\delta, B)$ -RRC  
 507 experiments if the Monte-Carlo estimators are sufficiently accurate.

---

**Algorithm 2** Output ramp size adaptively

---

**Input:**  $B < 0, \delta \in [0, 1)$

```

1: Initialize  $t \leftarrow 1, \prod_{r=1}^0 (1 - \Delta_r) \leftarrow 1$ 
2: while  $\prod_{r=1}^{t-1} (1 - \Delta_r) > 1 - \delta$  do
3:   choose  $\Delta_t \in \left[0, \frac{1-\delta}{\prod_{r=1}^{t-1} (1-\Delta_r)} - 1\right], b_t \geq B$ 
4:   run MCMC to obtain posterior samples in (21) and computes  $\hat{\varphi}_t(0)$ 
5:   if  $\hat{\varphi}_t(0) \leftarrow 0$  then  $m_t \leftarrow 0$ 
6:   else
7:     compute  $\hat{\varphi}_t(1), \dots, \hat{\varphi}_t^{(6)}$  using (22) and then  $A_t, B_t, C_t$  by (24)
8:     find  $\mathcal{V}_t \leftarrow \left\{m \in \mathbb{N}_+ \cap [0, N_t/2] : m \cdot \hat{\varphi}_t(1) + \hat{\varphi}_t^{(2)} \geq b_t, A_t m^2 + B_t m + C_t \geq 0\right\}$ 
9:     if  $\mathcal{V}_t \neq \emptyset$  then
10:       $m_t \leftarrow \max \mathcal{V}_t$ 
11:     else
12:       $m_t \leftarrow 0$ 
13:     end if
14:   end if
15:   Output  $m_t$  and then conduct stage  $t$ -experiment and observe the outcomes
16:   update  $t \leftarrow t + 1$ 
17: end while

```

---

508 We have conducted preliminary simulations of the proposed procedure for a multivariate Gaussian  
 509 outcome model with Gaussian-inverse-Wishart prior, and observed satisfactory results. However,  
 510 we defer presenting numerical results until future work when a more systematic investigation of  
 511 Monte-Carlo based procedures can be conducted.

## 512 F LinkedIn experiment data

513 In Table 1 below,  $\mu_{\text{true}}(w), \sigma(w)^2, w = 0, 1$  are sample statistics from the actual LinkedIn experiment.  
 514  $N_t$  are incoming population size reduced by  $10^4$  factor for tractability on a personal computer.

| Stages $t$             | 1      | 2      | 3      | 4      | 5      | 6      |
|------------------------|--------|--------|--------|--------|--------|--------|
| $\mu_{\text{true}}(0)$ | 0.3648 | 0.3780 | 0.3752 | 0.2317 | 0.4009 | 0.3930 |
| $\mu_{\text{true}}(1)$ | 0.3659 | 0.3788 | 0.3754 | 0.2317 | 0.4010 | 0.3941 |
| $\sigma(0)^2$          | 2.0993 | 2.2769 | 2.0909 | 1.1165 | 2.2705 | 2.3982 |
| $\sigma(1)^2$          | 2.0923 | 2.2248 | 2.0135 | 1.0526 | 2.2476 | 2.4430 |
| $N_t$                  | 10,756 | 10,460 | 10,598 | 7,580  | 10,550 | 10,688 |

Table 1: LinkedIn experiment data

## 515 G Thompson-sampling based Bayesian bandit

516 This algorithm is developed in [27, Section 4] for clinical trials. The algorithm assigns a user  $i$  at  
 517 stage  $t \geq 1$  to treatment with probability

$$\mathbb{P}(i \in \mathcal{T}_t) = \frac{\mathbb{P}(\mu_{\text{true}}(1) > \mu_{\text{true}}(0) \mid \mathcal{F}_{t-1})^c}{\mathbb{P}(\mu_{\text{true}}(1) > \mu_{\text{true}}(0) \mid \mathcal{F}_{t-1})^c + \mathbb{P}(\mu_{\text{true}}(1) \leq \mu_{\text{true}}(0) \mid \mathcal{F}_{t-1})^c}$$



518 for tuning parameter  $c > 0$ . Under Definition 3.1, by (15d), we have that

$$\mathbb{P}(\mu_{\text{true}}(1) > \mu_{\text{true}}(0) \mid \mathcal{F}_{t-1}) = \Phi\left(\frac{\mu_{p,t}(1) - \mu_{p,t}(0)}{\sqrt{\sigma_{p,t}(0)^2 + \sigma_{p,t}(1)^2}}\right).$$
